# Supplementary material for: Drastic improvement in the photocatalytic activity of Ga2O3 modified with Mg–Al layered double hydroxide for the conversion of CO2 in water
Source: Royal Society of Chemistry journal article supplement (doi:10.1039/c7se00204a), 2017-01-01
Supplement: c7se00204a1.pdf [file c7se00204a1.pdf]

## **Electronic Supplementary Information (ESI)**

# **Drastic Improvement in the Photocatalytic Activity of Ga<sub>2</sub>O<sub>3</sub> Modified with Mg–Al Layered Double Hydroxide for the Conversion of CO<sub>2</sub> in Water**

### **Corresponding authors**

Prof. Kentaro Teramura and Prof. Tsunehiro Tanaka

Department of Molecular Engineering, Graduate School of Engineering, Kyoto University, Kyotodaigaku Katsura, Nishikyo-ku, Kyoto 615–8510, Japan

Tel: +81–75–383–2559 Fax: +81–75–383–2561

E-mail address: teramura@moleng.kyoto-u.ac.jp

### **List of the authors**

Shoji Iguchi,<sup>a</sup> Yudai Hasegawa,<sup>a</sup> Kentaro Teramura,<sup>a,b</sup> Shotaro Kidera,<sup>a</sup> Soichi Kikkawa,<sup>a</sup> Saburo Hosokawa,<sup>a,b</sup> Hiroyuki Asakura<sup>a,b</sup> and Tsunehiro Tanaka<sup>a,b</sup>

### **Affiliation and full postal address**

a. Department of Molecular Engineering, Graduate School of Engineering, Kyoto University, Kyotodaigaku Katsura, Nishikyo-ku, Kyoto 615–8510, Japan.

b. Elements Strategy Initiative for Catalysts & Batteries (ESICB), Kyoto University, 1-30 Goryo-Ohara, Nishikyo-ku, Kyoto 615–8245, Japan.

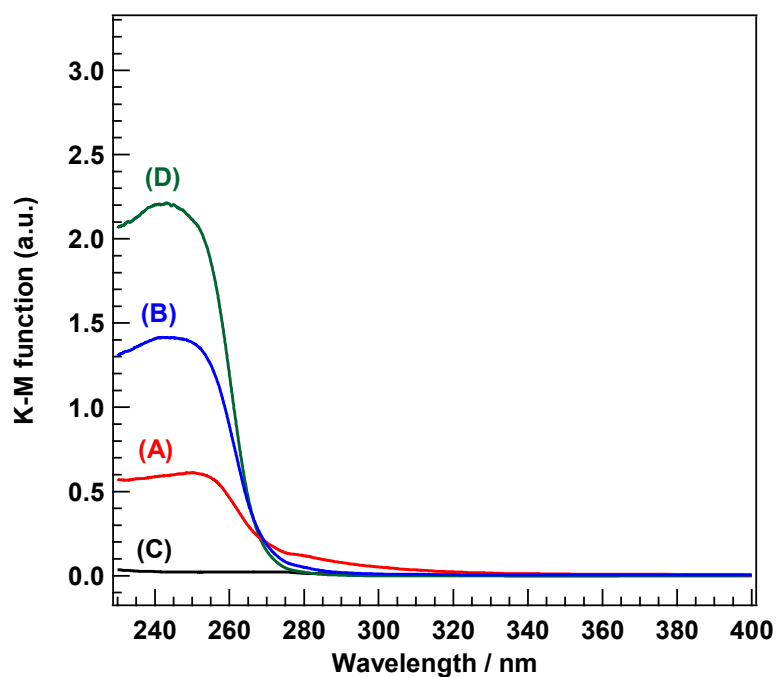

Figure S1 UV/Vis spectra of (A)  $0.25\text{Ag}/95\text{-MgAl}/\text{Ga}_2\text{O}_3$ , (B)  $95\text{-MgAl}/\text{Ga}_2\text{O}_3$ , (C)  $\text{Mg-Al LDH}$ , and (D)  $\text{Ga}_2\text{O}_3$ . UV/Vis diffuse reflectance spectra of the photocatalysts were measured using a UV-VIS Spectrophotometer (V-650, JASCO) equipped with an integrated sphere.  $\text{BaSO}_4$  plate was used as a standard baseline for these spectra.

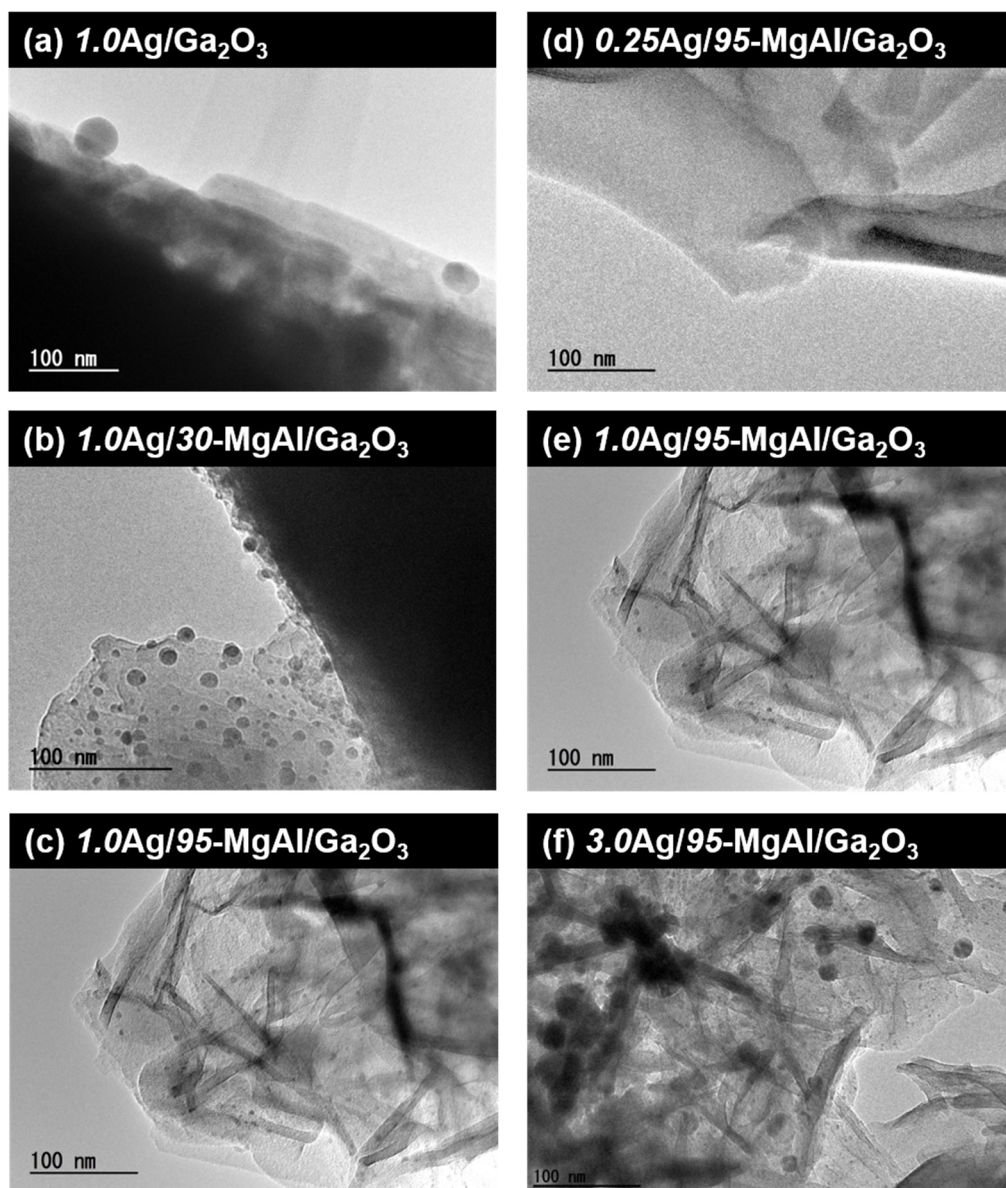

Figure S2 TEM images of (a)  $1.0\text{Ag}/\text{Ga}_2\text{O}_3$ , (b)  $1.0\text{Ag}/30\text{-MgAl}/\text{Ga}_2\text{O}_3$ , (c)  $1.0\text{Ag}/95\text{-MgAl}/\text{Ga}_2\text{O}_3$ , (d)  $0.25\text{Ag}/95\text{-MgAl}/\text{Ga}_2\text{O}_3$ , (e)  $1.0\text{Ag}/95\text{-MgAl}/\text{Ga}_2\text{O}_3$ , and (f)  $3.0\text{Ag}/95\text{-MgAl}/\text{Ga}_2\text{O}_3$ , captured on JEM-2100F TEM system (Japan Electron Optics Laboratory).

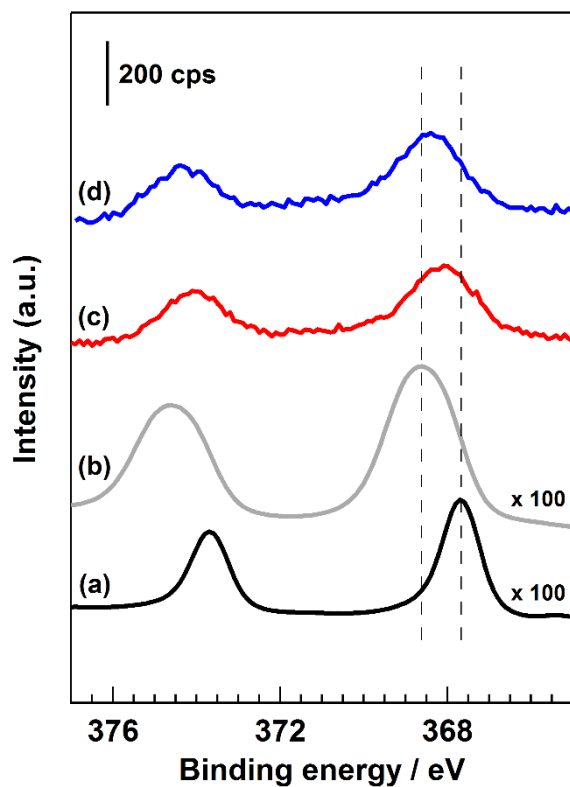

Figure S3 Ag 3d X-ray photoelectron spectra of (a) Ag powder, (b)  $\text{Ag}_2\text{O}$ , (c)  $0.25\text{Ag}/95\text{-MgAl}/\text{Ga}_2\text{O}_3$ , and (d)  $0.25\text{Ag}/95\text{-MgAl}/\text{Ga}_2\text{O}_3$  after photoirradiation for 5 h. X-ray photoelectron spectra of composite photocatalysts were measured by ESCA-3400 (Shimadzu) using Mg  $K_\alpha$  characteristic X-ray radiation. Peak positions were corrected by using C 1s peaks.

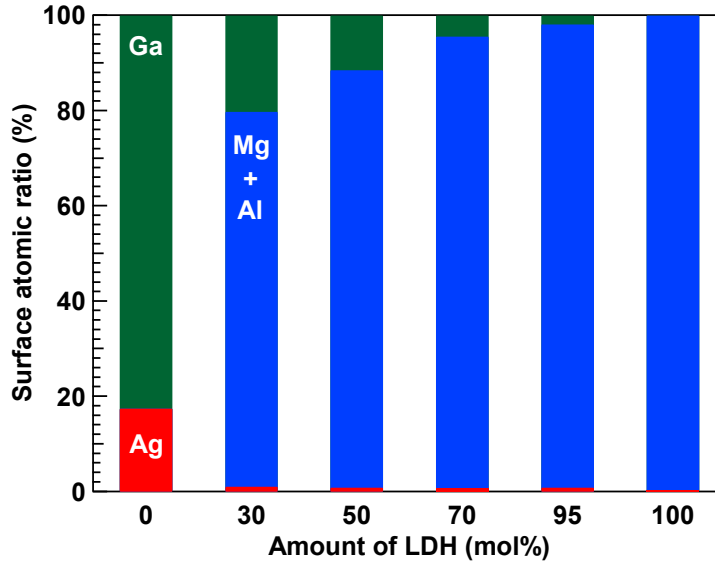

Figure S4 Surface atomic ratio of Ag cocatalyst loaded  $x$ -MgAl/Ga<sub>2</sub>O<sub>3</sub> composite photocatalysts ( $x = 0, 30, 50, 70, 95$ ) and bare Mg–Al LDH. X-ray photoelectron spectra of composite photocatalysts were measured by ESCA-3400 (Shimadzu) using Mg  $K_{\alpha}$  characteristic X-ray radiation. Surface atomic ratios of elements were calculated using the following equations.

$$A_{\text{total}} = A_{\text{Ag}} + A_{\text{Ga}} + A_{\text{Mg}} + A_{\text{Al}}$$

$$\text{Ag (\%)} = 100 \times A_{\text{Ag}} / A_{\text{total}}$$

$$\text{Ga (\%)} = 100 \times A_{\text{Ga}} / A_{\text{total}}$$

$$\text{Mg + Al (\%)} = 100 \times (A_{\text{Mg}} + A_{\text{Al}}) / A_{\text{total}}$$

, where  $A_{\text{Ag}}$ ,  $A_{\text{Ga}}$ ,  $A_{\text{Mg}}$ , and  $A_{\text{Al}}$  are peak areas in the spectra attributed to Ag 3d, Ga 2p, Mg 2p, and Al 2p, respectively.

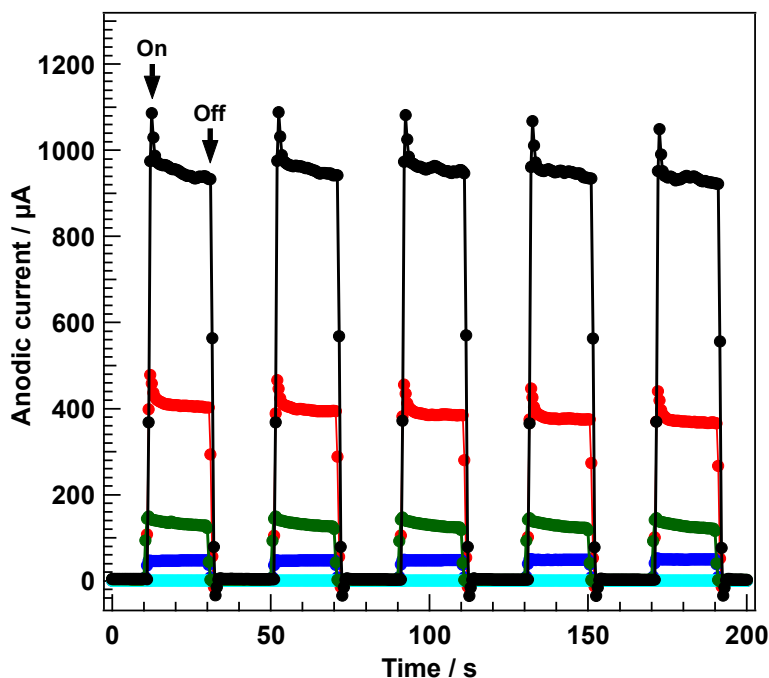

Figure S5 Anodic photocurrent value of Ag cocatalyst loaded  $x$ -MgAl/Ga<sub>2</sub>O<sub>3</sub> composite photocatalysts ( $x = \text{—}$ : 0, —: 30, —: 50, —: 70, —: 95) with on/off UV light irradiation in the presence of methanol in the electrolyte solution. The composite photocatalysts were coated on a fluorine doped tin oxide (FTO) conductive glass by the electrophoresis deposition. The powder sample of the composite photocatalyst was dispersed thoroughly in an acetone solution containing iodine (I<sub>2</sub>), and then direct current (DC) was applied to the FTO glasses, which comprised two-electrode electrochemical cell, at 10.0 V stable bias. Photocurrent value was measured by using three-electrode electrochemical cell under the photoirradiation by 200 W Hg-Xe lamp through quartz glass window. The obtained anodic photocurrent values were normalized by the weight of Ga<sub>2</sub>O<sub>3</sub> contained in the composite photocatalysts.

Table S1

The result of photocatalytic conversion of CO<sub>2</sub> in water for 0.25Ag/95-MgAl/Ga<sub>2</sub>O<sub>3</sub> composite photocatalyst and a series of reference photocatalysts. The content of Ga<sub>2</sub>O<sub>3</sub> in photocatalyst powder was fixed at 0.19 g. Reaction solution: 1.0 L of aqueous NaHCO<sub>3</sub> solution (0.1 M), CO<sub>2</sub> supply: 30 mL min<sup>-1</sup>, light source: 400 W high-pressure Hg lamp (through quartz glass jacket), photoirradiation time: 1 h.

| Sample                                          | Type      | Weight / g |                                | Formation rate / $\mu\text{mol h}^{-1}$ |                |       | Selectivity to CO (%) |
|-------------------------------------------------|-----------|------------|--------------------------------|-----------------------------------------|----------------|-------|-----------------------|
|                                                 |           | Total      | Ga <sub>2</sub> O <sub>3</sub> | H <sub>2</sub>                          | O <sub>2</sub> | CO    |                       |
| 95-MgAl/Ga <sub>2</sub> O <sub>3</sub>          | composite | 1.0        | 0.19                           | 534.9                                   | 252.0          | 1.4   | 0.2                   |
| 0.25Ag/95-MgAl/Ga <sub>2</sub> O <sub>3</sub>   | composite | 1.0        | 0.19                           | 131.2                                   | 166.9          | 211.7 | 61.7                  |
| 95-MgAl/0.25Ag/Ga <sub>2</sub> O <sub>3</sub>   | composite | 1.6        | 0.19                           | 148.0                                   | 76.2           | 31.5  | 17.5                  |
| 95-MgAl + 0.25Ag/Ga <sub>2</sub> O <sub>3</sub> | mixture   | 1.0        | 0.19                           | 348.2                                   | 191.4          | 56.8  | 14.0                  |
| 0.25Ag/Ga <sub>2</sub> O <sub>3</sub>           | bare      | 0.19       | 0.19                           | 130.7                                   | 85.0           | 43.6  | 25.0                  |
| 1.0Ag/Mg-Al LDH                                 | bare      | 0.50       | 0.00                           | trace                                   | trace          | trace | —                     |

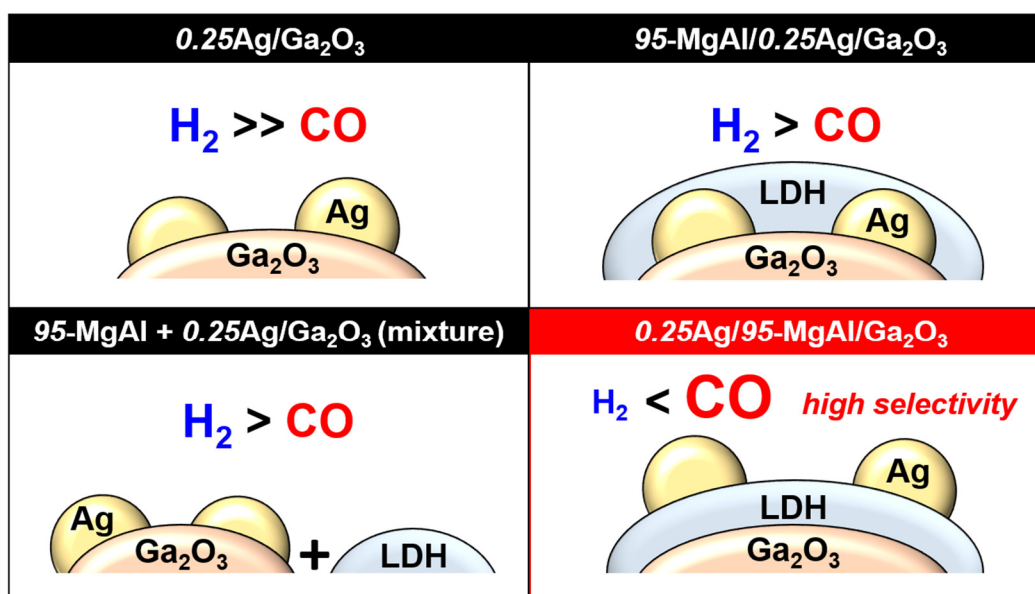

Figure S6 Schematic illustrations of  $0.25\text{Ag}/\text{Ga}_2\text{O}_3$  (bare photocatalyst),  $95\text{-MgAl}/0.25\text{Ag}/\text{Ga}_2\text{O}_3$  (reference composite photocatalyst),  $95\text{-MgAl} + 0.25\text{Ag}/\text{Ga}_2\text{O}_3$  (mixture photocatalyst), and  $0.25\text{Ag}/95\text{-MgAl}/\text{Ga}_2\text{O}_3$  (composite photocatalyst).



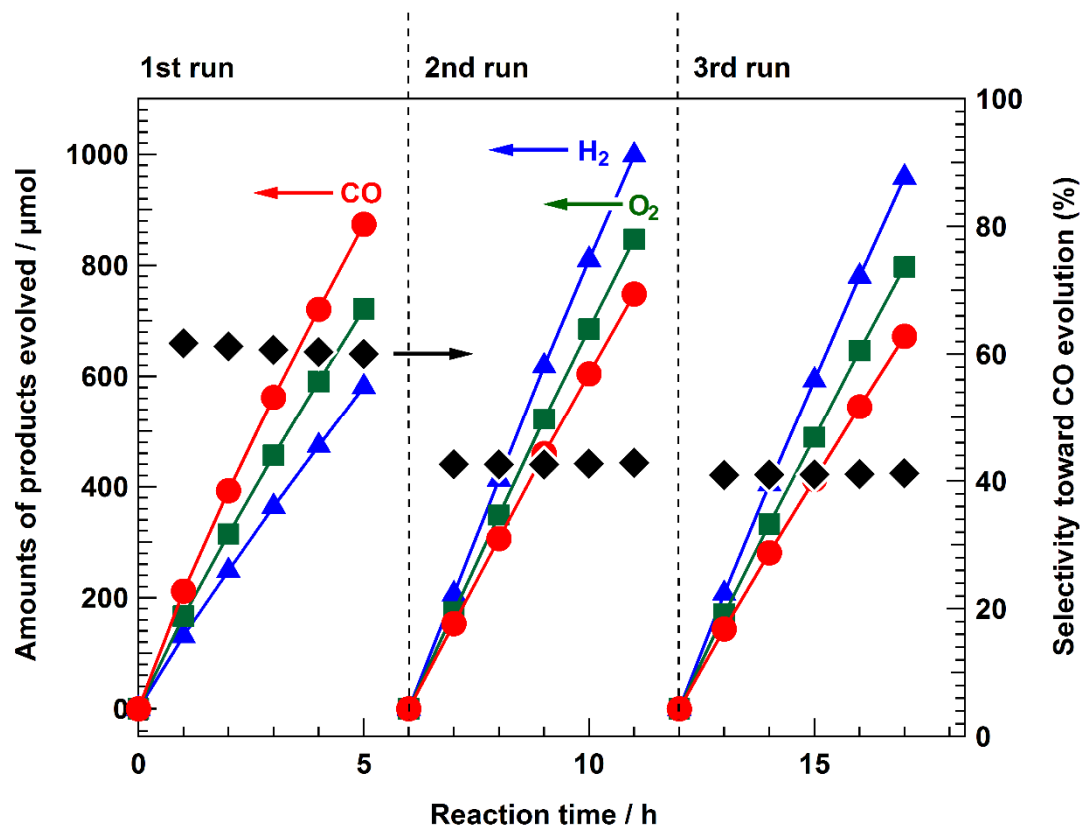

Figure S7 The amounts of products evolved (left axis) and the selectivity toward CO evolution (right axis) in the repeating test for the photocatalytic conversion of CO<sub>2</sub> in water using 0.25Ag/95-MgAl/Ga<sub>2</sub>O<sub>3</sub> photocatalyst. Red circle: CO, green square: O<sub>2</sub>, blue triangle: H<sub>2</sub>, black diamond: selectivity toward CO evolution. Photocatalyst weight: 1.0 g, reaction solution: 1.0 L of an aqueous NaHCO<sub>3</sub> solution (0.1 M), CO<sub>2</sub> supply: 30 mL min<sup>-1</sup>, light source: 400 W high-pressure Hg lamp (through a quartz glass jacket). The reaction solution was thoroughly degassed by a flow of high-purity CO<sub>2</sub> gas after 1st and 2nd run.

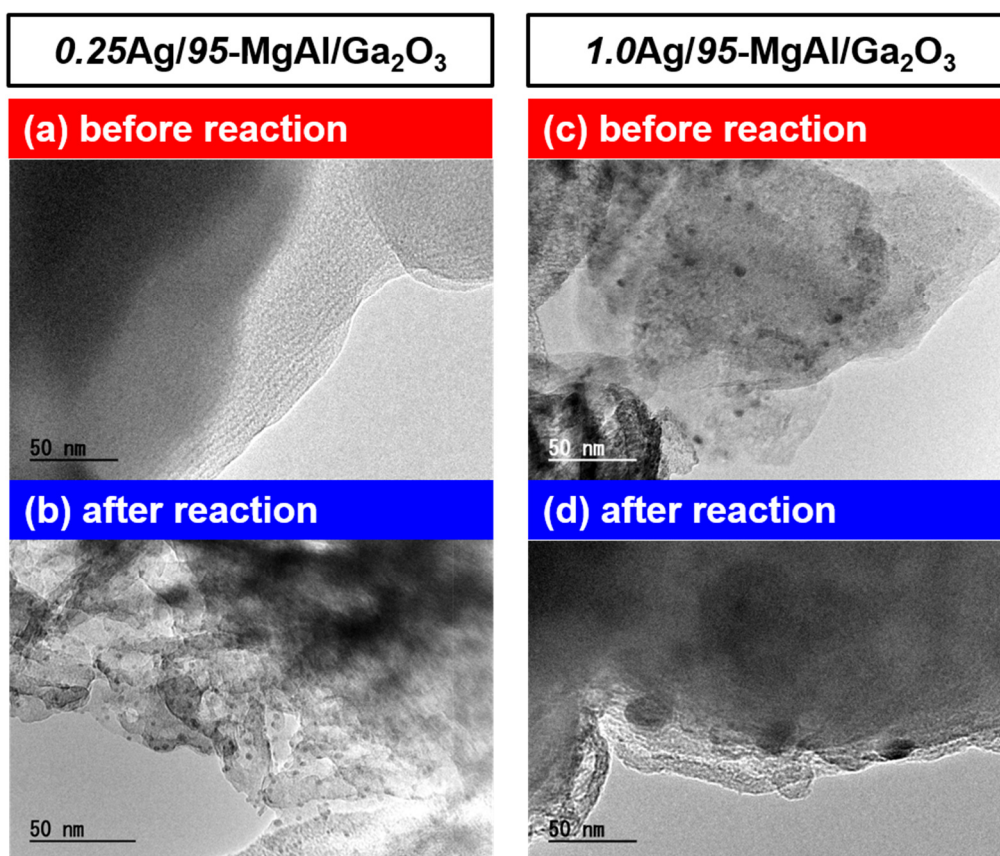

Figure S8 TEM images of (a) before and (b) after reaction for  $0.25\text{Ag}/95\text{-MgAl}/\text{Ga}_2\text{O}_3$ , and (c) before and (d) after reaction for  $1.0\text{Ag}/95\text{-MgAl}/\text{Ga}_2\text{O}_3$ , captured on JEM-2100F TEM system (Japan Electron Optics Laboratory).
